# Supplementary material for: Chromosome Synapsis and Recombination in Male Hybrids between Two Chromosome Races of the Common Shrew (Sorex araneus L., Soricidae, Eulipotyphla)
Source: MDPI journal article supplement (doi:10.3390/genes8100282), 2017-10-20
Supplement: s1 [file s1]

**Supplementary Figure S1.**

G-banded karyotypes of the male shrews of Novosibirsk and Tomsk races and their hybrid.

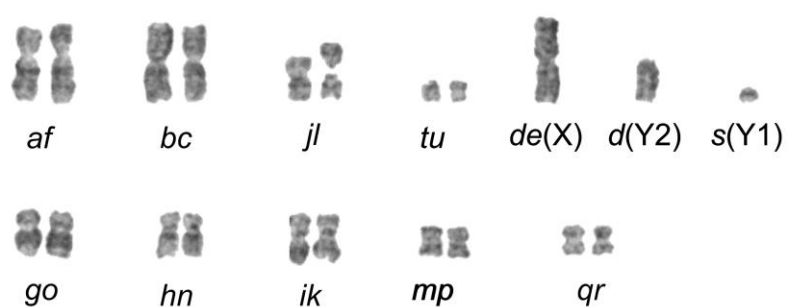

Novosibirsk race

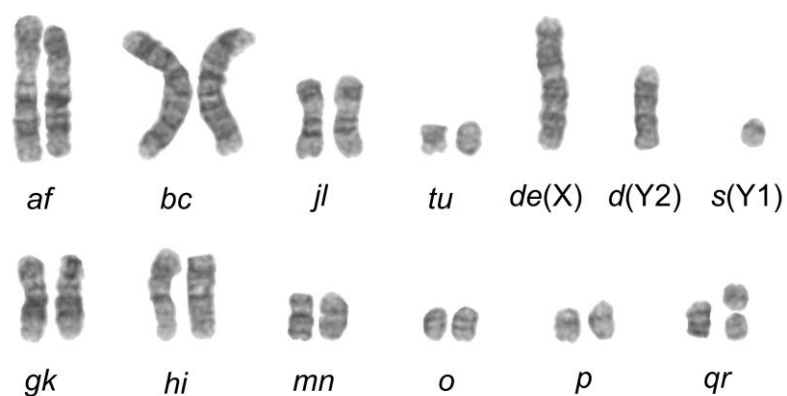

Tomsk race

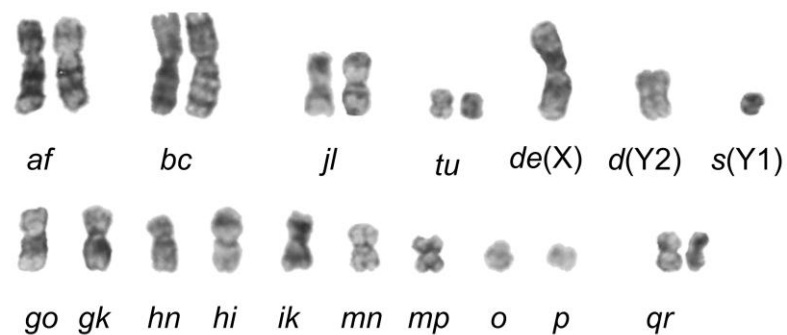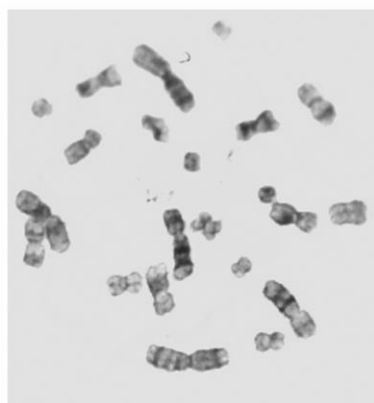

Hybrid between Novosibirsk and Tomsk races
