# Supplementary material for: Chromosome Synapsis and Recombination in Male Hybrids between Two Chromosome Races of the Common Shrew (Sorex araneus L., Soricidae, Eulipotyphla)
Source: MDPI journal article supplement (doi:10.3390/genes8100282), 2017-10-20
Supplement: s1 [file s1]

**Supplementary Table S1.** Number of MLH1 foci per chromosome arm

| Arm                           | Synaptic type           | Number of MLH1 foci |      | Number of chromosomes examined | Number of animals |
|-------------------------------|-------------------------|---------------------|------|--------------------------------|-------------------|
|                               |                         | Mean                | S.D. |                                |                   |
| Invariable chromosomes        |                         |                     |      |                                |                   |
| a                             | Met hom <sup>a</sup>    | 1.67                | 0.63 | 84                             | 7                 |
|                               | CVIII <sup>b</sup>      | 1.90                | 0.61 | 30                             | 2                 |
| b                             | Met hom                 | 1.40                | 0.54 | 84                             | 7                 |
|                               | CVIII                   | 1.52                | 0.57 | 29                             | 2                 |
| c                             | Met hom                 | 1.46                | 0.63 | 85                             | 7                 |
|                               | CVIII                   | 1.45                | 0.57 | 29                             | 2                 |
| d                             | Met hom                 | 1.53                | 0.61 | 89                             | 7                 |
|                               | CVIII                   | 1.50                | 0.56 | 36                             | 2                 |
| f                             | Met hom                 | 1.01                | 0.40 | 84                             | 7                 |
|                               | CVIII                   | 1.00                | 0.46 | 30                             | 2                 |
| j                             | Met hom                 | 1.01                | 0.41 | 81                             | 7                 |
|                               | CVIII                   | 0.89                | 0.32 | 36                             | 2                 |
| l                             | Met hom                 | 0.94                | 0.33 | 81                             | 7                 |
|                               | CVIII                   | 0.92                | 0.37 | 36                             | 2                 |
| t                             | Met hom                 | 0.32                | 0.47 | 89                             | 7                 |
|                               | CVIII                   | 0.34                | 0.48 | 35                             | 2                 |
| u                             | Met hom                 | 0.59                | 0.5  | 89                             | 7                 |
|                               | CVIII                   | 0.66                | 0.48 | 35                             | 2                 |
| Chromosomes involved in CVIII |                         |                     |      |                                |                   |
| g                             | Met hom                 | 1.18                | 0.54 | 57                             | 6                 |
|                               | CIII <sup>c</sup> (g/o) | 1.12                | 0.43 | 26                             | 1                 |
|                               | CVIII                   | 1.29                | 0.58 | 34                             | 2                 |
| h                             | Met hom                 | 0.99                | 0.46 | 85                             | 7                 |
|                               | CVIII                   | 1.13                | 0.42 | 32                             | 2                 |
| i                             | Met hom                 | 1.00                | 0.42 | 81                             | 7                 |
|                               | CVIII                   | 0.94                | 0.34 | 35                             | 2                 |
| k                             | Met hom                 | 0.88                | 0.40 | 83                             | 7                 |
|                               | CVIII                   | 1.03                | 0.39 | 34                             | 2                 |
| m                             | Met hom                 | 0.77                | 0.43 | 73                             | 6                 |
|                               | CIII (m/p)              | 0.79                | 0.43 | 14                             | 1                 |
|                               | CVIII                   | 0.92                | 0.37 | 36                             | 2                 |
| n                             | Met hom                 | 0.90                | 0.31 | 89                             | 7                 |
|                               | CVIII                   | 0.94                | 0.23 | 36                             | 2                 |
| o                             | Met hom                 | 0.73                | 0.45 | 37                             | 3                 |
|                               | CIII (g/o)              | 0.88                | 0.33 | 26                             | 1                 |
|                               | Acro hom <sup>d</sup>   | 0.93                | 0.38 | 27                             | 3                 |
|                               | CVIII                   | 0.97                | 0.17 | 33                             | 2                 |
| p                             | Met hom                 | 0.65                | 0.48 | 51                             | 3                 |
|                               | CIII (m/p)              | 0.79                | 0.43 | 14                             | 1                 |
|                               | Acro hom                | 0.97                | 0.26 | 60                             | 5                 |
| Chromosomes involved in CIII  |                         |                     |      |                                |                   |
| q                             | Met hom                 | 0.75                | 0.48 | 48                             | 4                 |
|                               | CIII                    | 0.83                | 0.38 | 72                             | 4                 |
|                               | Acro hom                | 1.00                | -    | 6                              | 1                 |
| r                             | Met hom                 | 0.83                | 0.42 | 48                             | 4                 |
|                               | CIII                    | 0.86                | 0.35 | 72                             | 4                 |
|                               | Acro hom                | 1.00                | -    | 6                              | 1                 |

a – metacentric homozygotes

- b – CVIII carriers
- c – CIII carriers
- d – acrocentric homozygotes
